# Supplementary material
Source: publisher figshare collection journal article supplement (https://acs.figshare.com/ndownloader/files/5133133)

## **Supplemental Materials**

### **Non-interpenetrated 1D Molecular Ladder and 2D Butterfly Network: Effect of Positional Isomerism of Semirigid Bis-pyridylmethylpyromellitic Diimide Ligands on the Architecture of Their Metal(II) Complexes**

**Xing-Qiang Lü, Ji-Jun Jiang, Li Zhang, Bei-Sheng Kang, Hans-Conrad zur Loye  
and Cheng-Yong Su,**

**Figure S1** XRD pattern of the complex **1** (bottom) and the single crystal diffraction simulation (top).

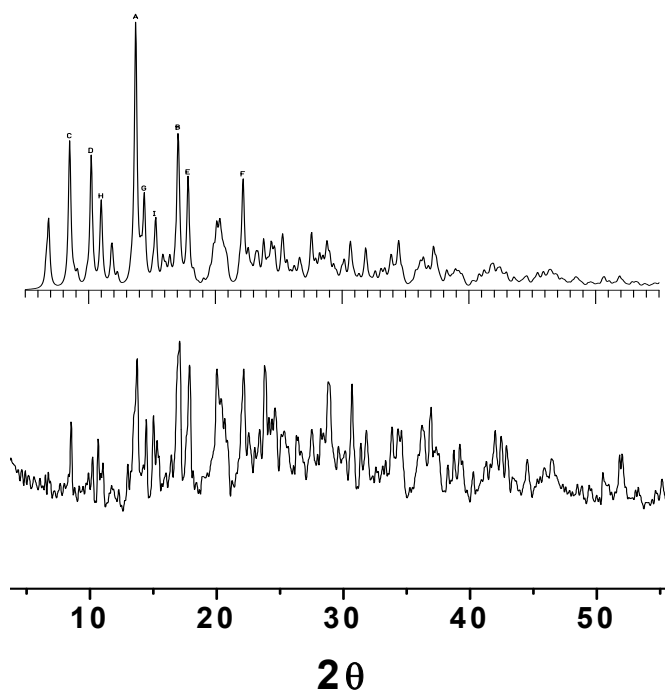

**Figure S2** XRD pattern of the complex **2** (bottom) and the single crystal diffraction simulation (top).

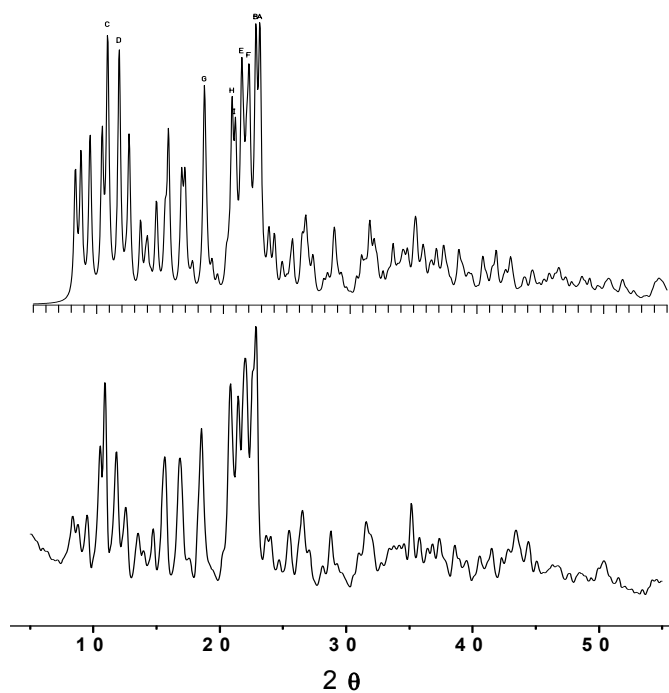

**Figure S3** XRD pattern of the complex **3** (bottom) and the single crystal diffraction simulation (top).

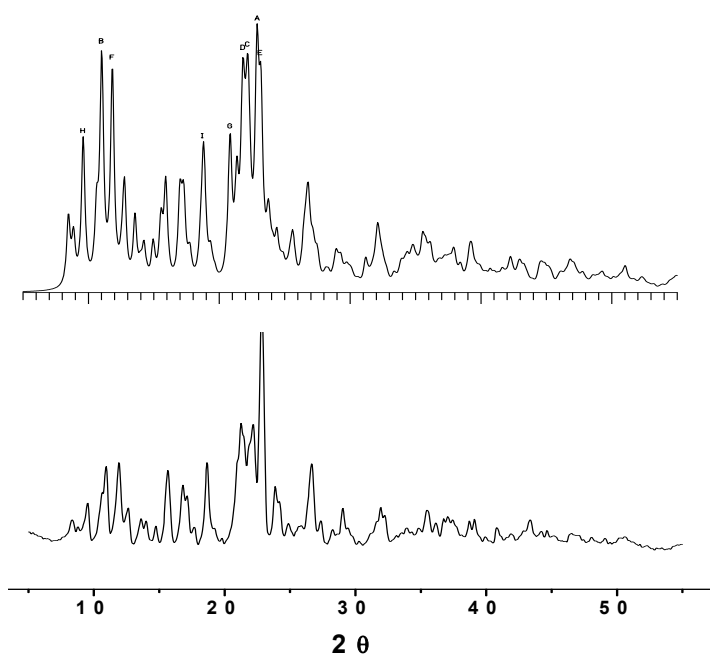

Supplement: Supplementary file 1 [file 5133133]
